# Supplementary material
Source: Springer Nature journal article supplement (https://www.springermedizin.de/resource/supplementary/12933_2011_354_MOESM1_ESM.pdf/9538228)

A

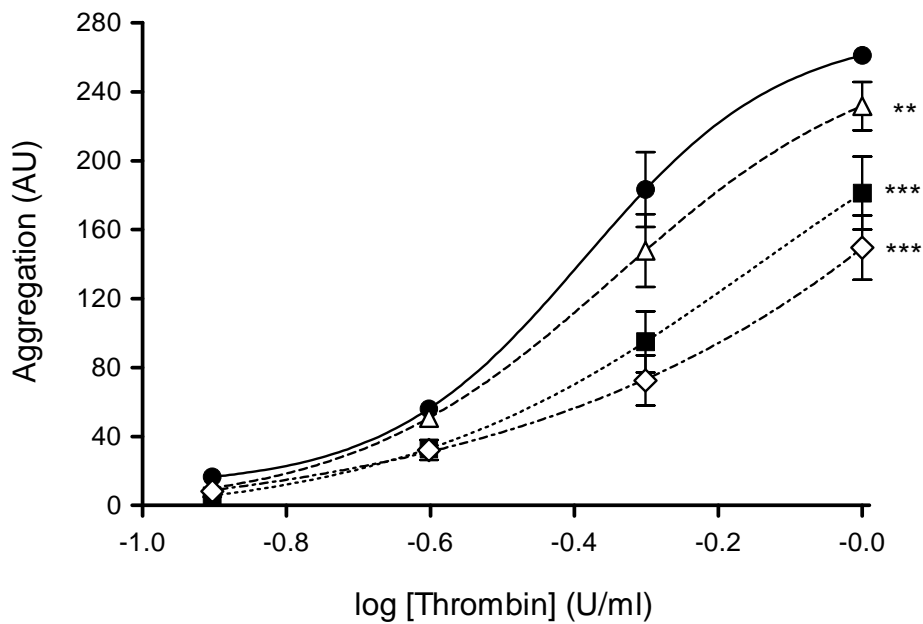

B

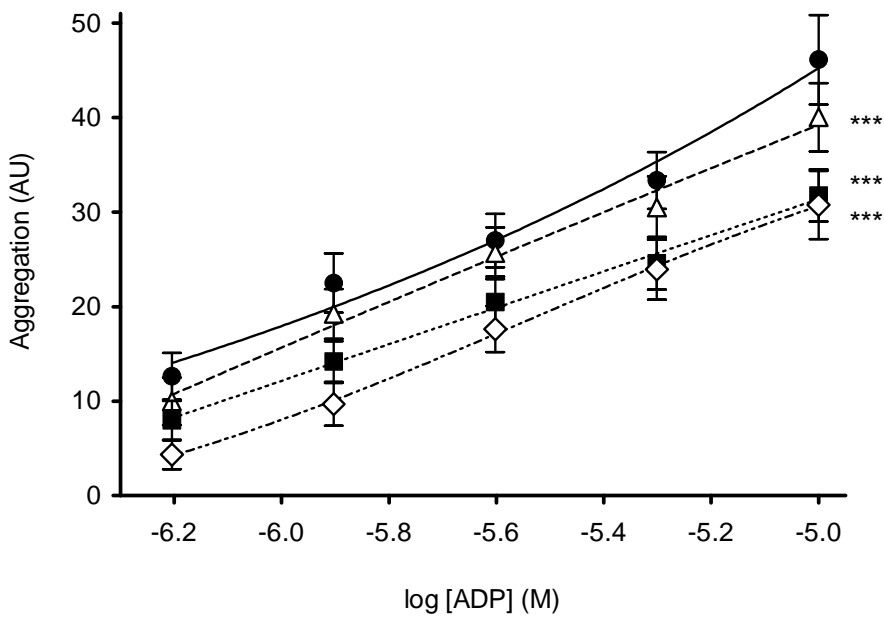

Supplement: MOESM1 [file 9538228]
